# Supplementary material for: Heat pain modulation with virtual water during a virtual hand illusion
Source: PubMed Central journal article supplement (PMC6911006; doi:10.1038/s41598-019-55407-0), 2019-12-13
Supplement: 41598_2019_55407_MOESM1_ESM.pdf [file 41598_2019_55407_MOESM1_ESM.pdf]

# **Supplementary Information**

## **Heat pain modulation with virtual water during a virtual hand illusion**

Ivo Käthner\*<sup>1</sup>, Thomas Bader<sup>1</sup> & Paul Pauli<sup>1,2</sup>

<sup>1</sup>Department of Psychology I, Biological Psychology, Clinical Psychology and  
Psychotherapy, University of Würzburg, Würzburg, Germany

<sup>2</sup>Center of Mental Health, Medical Faculty, University of Würzburg, Würzburg, Germany

**Supplementary Table S1.** Individual pain ratings (intensity and unpleasantness) for each of the six experimental conditions.

| Participant | High Control (HC) |           |         |          |        |         | Low Control (LC) |           |         |          |        |         | Intensity (HC+LC) |         |        | Unpleasantness (HC+LC) |          |         |
|-------------|-------------------|-----------|---------|----------|--------|---------|------------------|-----------|---------|----------|--------|---------|-------------------|---------|--------|------------------------|----------|---------|
|             | Blue_Int          | Blue_Unpl | Red_Int | Red_Unpl | No_Int | No_Unpl | Blue_Int         | Blue_Unpl | Red_Int | Red_Unpl | No_Int | No_Unpl | Blue_Int          | Red_Int | No_Int | Blue_Unpl              | Red_Unpl | No_Unpl |
| 1           | 57.33             | 56.00     | 51.00   | 46.67    | 42.33  | 41.33   | 53.00            | 45.00     | 53.00   | 47.50    | 56.67  | 55.00   | 55.17             | 52.00   | 49.50  | 50.50                  | 47.08    | 48.17   |
| 2           | 28.33             | 20.00     | 37.67   | 27.67    | 33.33  | 22.00   | 22.33            | 17.67     | 27.00   | 20.00    | 19.50  | 17.50   | 25.33             | 32.33   | 26.42  | 18.83                  | 23.83    | 19.75   |
| 3           | 41.00             | 45.00     | 49.67   | 55.67    | 55.67  | 61.00   | 41.67            | 41.33     | 54.67   | 56.00    | 50.67  | 54.33   | 41.33             | 52.17   | 53.17  | 43.17                  | 55.83    | 57.67   |
| 4           | 18.00             | 21.33     | 59.00   | 68.00    | 48.67  | 44.67   | 45.00            | 32.50     | 61.67   | 68.00    | 34.67  | 23.67   | 31.50             | 60.33   | 41.67  | 26.92                  | 68.00    | 34.17   |
| 5           | 56.00             | 55.67     | 55.33   | 59.00    | 51.67  | 49.00   | 58.33            | 63.00     | 50.00   | 51.00    | 58.67  | 56.00   | 57.17             | 52.67   | 55.17  | 59.33                  | 55.00    | 52.50   |
| 6           | 23.67             | 16.00     | 25.00   | 26.00    | 21.33  | 21.33   | 23.00            | 7.33      | 20.67   | 13.33    | 21.00  | 23.33   | 23.33             | 22.83   | 21.17  | 11.67                  | 19.67    | 22.33   |
| 7           | 68.00             | 61.33     | 66.33   | 54.00    | 60.67  | 57.00   | 62.33            | 52.33     | 62.67   | 55.00    | 58.67  | 50.33   | 65.17             | 64.50   | 59.67  | 56.83                  | 54.50    | 53.67   |
| 8           | 58.00             | 51.00     | 74.67   | 83.00    | 76.67  | 74.67   | 75.67            | 69.00     | 83.33   | 76.67    | 78.00  | 70.33   | 66.83             | 79.00   | 77.33  | 60.00                  | 79.83    | 72.50   |
| 9           | 52.33             | 52.00     | 67.50   | 68.50    | 50.50  | 56.00   | 38.67            | 35.33     | 52.67   | 51.00    | 37.67  | 32.33   | 45.50             | 60.08   | 44.08  | 43.67                  | 59.75    | 44.17   |
| 10          | 32.67             | 25.67     | 30.00   | 34.00    | 31.33  | 32.67   | 26.00            | 21.33     | 30.00   | 37.67    | 29.00  | 28.67   | 29.33             | 30.00   | 30.17  | 23.50                  | 35.83    | 30.67   |
| 11          | 54.67             | 70.67     | 53.00   | 70.67    | 29.67  | 37.33   | 41.33            | 54.67     | 46.00   | 67.67    | 47.67  | 53.00   | 48.00             | 49.50   | 38.67  | 62.67                  | 69.17    | 45.17   |
| 12          | 57.67             | 49.00     | 73.00   | 70.00    | 60.33  | 54.33   | 53.67            | 47.00     | 64.33   | 59.33    | 72.50  | 70.00   | 55.67             | 68.67   | 66.42  | 48.00                  | 64.67    | 62.17   |
| 13          | 9.00              | 9.67      | 16.50   | 18.33    | 15.00  | 17.67   | 9.67             | 12.67     | 27.00   | 19.00    | 15.33  | 15.67   | 9.33              | 21.75   | 15.17  | 11.17                  | 18.67    | 16.67   |
| 14          | 18.33             | 2.67      | 36.00   | 29.00    | 22.50  | 14.50   | 24.33            | 14.00     | 40.33   | 26.33    | 37.00  | 22.00   | 21.33             | 38.17   | 29.75  | 8.33                   | 27.67    | 18.25   |
| 15          | 50.67             | 34.67     | 65.00   | 61.00    | 74.00  | 63.33   | 43.33            | 33.00     | 72.33   | 68.33    | 53.67  | 44.00   | 47.00             | 68.67   | 63.83  | 33.83                  | 64.67    | 53.67   |
| 16          | 59.33             | 61.00     | 76.00   | 68.33    | 73.33  | 69.00   | 77.67            | 71.67     | 82.50   | 72.00    | 74.67  | 72.33   | 68.50             | 79.25   | 74.00  | 66.33                  | 70.17    | 70.67   |
| 17          | 43.67             | 50.33     | 69.33   | 81.33    | 46.67  | 43.67   | 54.00            | 52.67     | 65.67   | 65.00    | 57.33  | 60.33   | 48.83             | 67.50   | 52.00  | 51.50                  | 73.17    | 52.00   |
| 18          | 47.00             | 40.33     | 60.33   | 62.33    | 56.67  | 51.33   | 45.33            | 49.33     | 57.33   | 56.00    | 49.67  | 49.33   | 46.17             | 58.83   | 53.17  | 44.83                  | 59.17    | 50.33   |
| 19          | 11.67             | 17.67     | 34.00   | 40.00    | 9.67   | 10.33   | 13.00            | 15.67     | 21.67   | 25.67    | 7.50   | 11.00   | 12.33             | 27.83   | 8.58   | 16.67                  | 32.83    | 10.67   |
| 20          | 60.33             | 56.00     | 52.67   | 55.33    | 58.67  | 54.00   | 60.33            | 55.67     | 57.67   | 53.67    | 57.00  | 52.00   | 60.33             | 55.17   | 57.83  | 55.83                  | 54.50    | 53.00   |
| 21          | 79.33             | 71.67     | 81.00   | 73.33    | 66.33  | 49.00   | 78.67            | 81.33     | 76.33   | 85.33    | 73.33  | 80.00   | 79.00             | 78.67   | 69.83  | 76.50                  | 79.33    | 64.50   |
| 22          | 14.67             | 21.67     | 31.33   | 40.67    | 24.00  | 26.33   | 12.33            | 21.00     | 14.00   | 23.67    | 29.00  | 35.50   | 13.50             | 22.67   | 26.50  | 21.33                  | 32.17    | 30.92   |
| 23          | 10.00             | 12.00     | 8.67    | 3.67     | 15.33  | 13.67   | 11.00            | 4.00      | 14.33   | 9.67     | 25.50  | 19.00   | 10.50             | 11.50   | 20.42  | 8.00                   | 6.67     | 16.33   |
| 24          | 43.00             | 37.67     | 48.67   | 49.33    | 39.00  | 46.00   | 30.33            | 29.33     | 46.67   | 47.33    | 35.00  | 40.33   | 36.67             | 47.67   | 37.00  | 33.50                  | 48.33    | 43.17   |
| 25          | 61.33             | 63.67     | 54.67   | 51.33    | 71.00  | 70.00   | 64.00            | 57.00     | 75.33   | 67.00    | 67.33  | 64.33   | 62.67             | 65.00   | 69.17  | 60.33                  | 59.17    | 67.17   |
| 26          | 11.00             | 14.33     | 9.00    | 10.00    | 30.67  | 30.00   | 13.67            | 11.67     | 43.33   | 42.00    | 28.33  | 32.33   | 12.33             | 26.17   | 29.50  | 13.00                  | 26.00    | 31.17   |
| 27          | 37.33             | 34.33     | 63.33   | 62.67    | 48.33  | 44.00   | 37.33            | 27.67     | 65.67   | 67.67    | 51.67  | 51.67   | 37.33             | 64.50   | 50.00  | 31.00                  | 65.17    | 47.83   |
| 28          | 31.33             | 33.33     | 73.00   | 71.33    | 43.00  | 49.67   | 51.67            | 43.00     | 60.67   | 67.33    | 60.00  | 73.67   | 41.50             | 66.83   | 51.50  | 38.17                  | 69.33    | 61.67   |
| 29          | 41.67             | 32.67     | 39.00   | 34.00    | 47.67  | 49.00   | 56.00            | 55.33     | 44.00   | 34.00    | 37.33  | 31.67   | 48.83             | 41.50   | 42.50  | 44.00                  | 34.00    | 40.33   |
| 30          | 39.00             | 37.00     | 35.00   | 31.33    | 38.00  | 31.33   | 36.33            | 35.33     | 31.33   | 31.00    | 20.67  | 25.00   | 37.67             | 33.17   | 29.33  | 36.17                  | 31.17    | 28.17   |
| 31          | 38.67             | 41.33     | 44.67   | 39.00    | 19.67  | 15.33   | 38.67            | 30.00     | 53.67   | 46.67    | 46.33  | 32.33   | 38.67             | 49.17   | 33.00  | 35.67                  | 42.83    | 23.83   |
| 32          | 55.00             | 51.67     | 57.00   | 46.00    | 56.00  | 54.50   | 48.67            | 48.33     | 62.00   | 51.00    | 64.33  | 58.67   | 51.83             | 59.50   | 60.17  | 50.00                  | 48.50    | 56.58   |
| 33          | 59.00             | 47.67     | 63.33   | 62.00    | 61.00  | 60.67   | 54.00            | 46.67     | 47.00   | 50.00    | 60.50  | 49.00   | 56.50             | 55.17   | 60.75  | 47.17                  | 56.00    | 54.83   |
| 34          | 83.33             | 83.00     | 83.67   | 84.00    | 80.67  | 82.00   | 68.33            | 76.00     | 82.67   | 71.67    | 68.33  | 67.67   | 75.83             | 83.17   | 74.50  | 79.50                  | 77.83    | 74.83   |
| 35          | 54.00             | 50.00     | 82.00   | 75.67    | 73.00  | 67.67   | 52.33            | 59.00     | 82.00   | 78.33    | 54.33  | 54.00   | 53.17             | 82.00   | 63.67  | 54.50                  | 77.00    | 60.83   |
| 36          | 64.67             | 71.00     | 59.33   | 63.67    | 63.67  | 73.33   | 70.33            | 76.67     | 64.50   | 71.00    | 72.67  | 76.00   | 67.50             | 61.92   | 68.17  | 73.83                  | 67.33    | 74.67   |
